# Supplementary material for: Visualization of the Nucleolus Using Ethynyl Uridine
Source: PubMed Central journal article supplement (PMC5820300; doi:10.3389/fpls.2018.00177), 2018-02-16
Supplement: Image_1.pdf [file Image_1.pdf]

*Supplementary Material*

**Visualization of the nucleolus using ethynyl uridine**

Martina Dvořáčková and Jiří Fajkus

\* Correspondence: [jiri.fajkus@ceitec.muni.cz](mailto:jiri.fajkus@ceitec.muni.cz), [dvorackova.martina@gmail.com](mailto:dvorackova.martina@gmail.com)

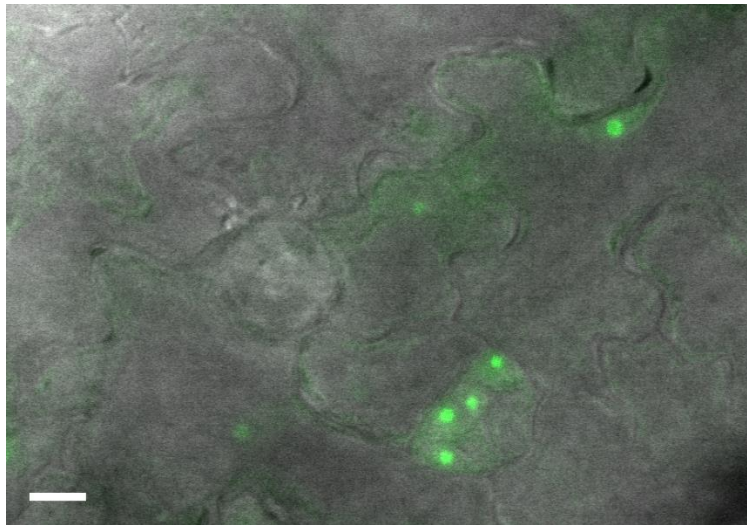

**Supplementary Figure 1. EU signal can be detected in the leaf cells.**

*Arabidopsis* 4 days old seedlings were incubated for 2 hr with 1 mM EU, fixed and EU-containing RNA (green) was detected by the click iT reaction, bar= 10  $\mu$ m

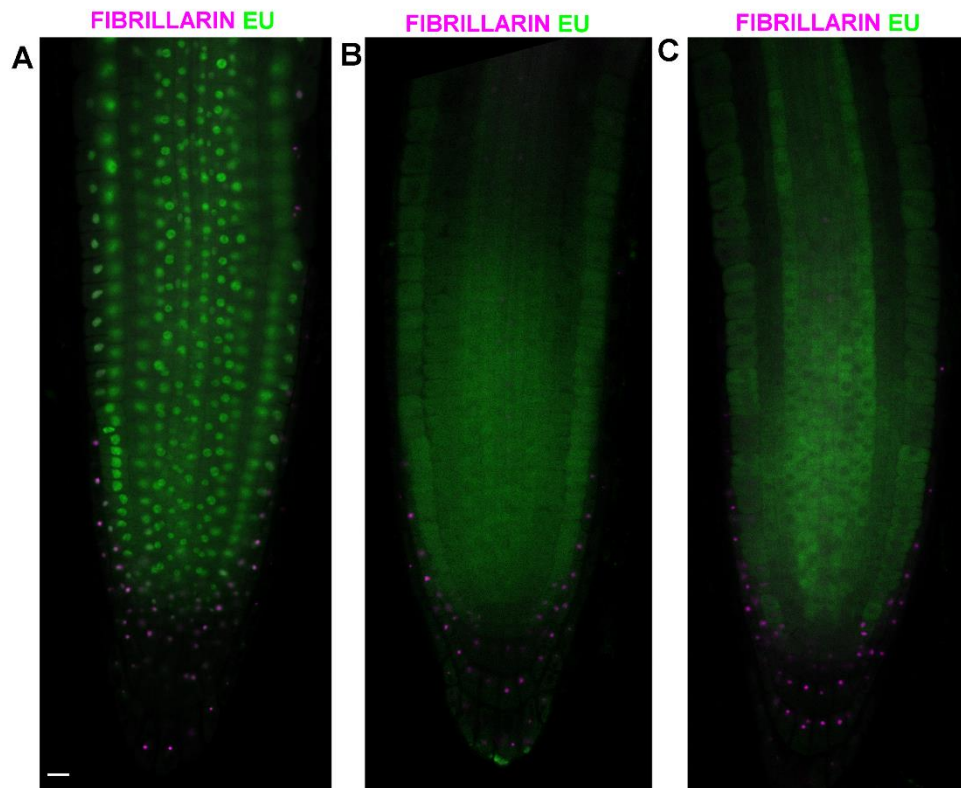

**Supplementary Figure 2. EU-labelled RNA shows fast turnover.**

- (A) *Arabidopsis* 4 days old seedlings expressing fibrillar-YFP (magenta) were incubated for 2 h with 1 mM EU, fixed and EU-containing RNA (green) was detected by the click iT reaction.
- (B) *Arabidopsis* 4 days old seedlings expressing fibrillar-YFP (magenta) were incubated for 2 h with 1 mM EU followed by incubation in EU-free medium for 3 h. EU-labelled seedlings were fixed and EU-containing RNA (green) was detected by the click iT reaction.
- (C) *Arabidopsis* 4 days old seedlings expressing fibrillar-YFP (magenta) were incubated for 2 h with 1 mM EU followed by incubation in EU-free medium for 6 h. EU-labelled seedlings were fixed and EU-containing RNA (green) was detected by the click iT reaction.

Bar=10  $\mu$ m

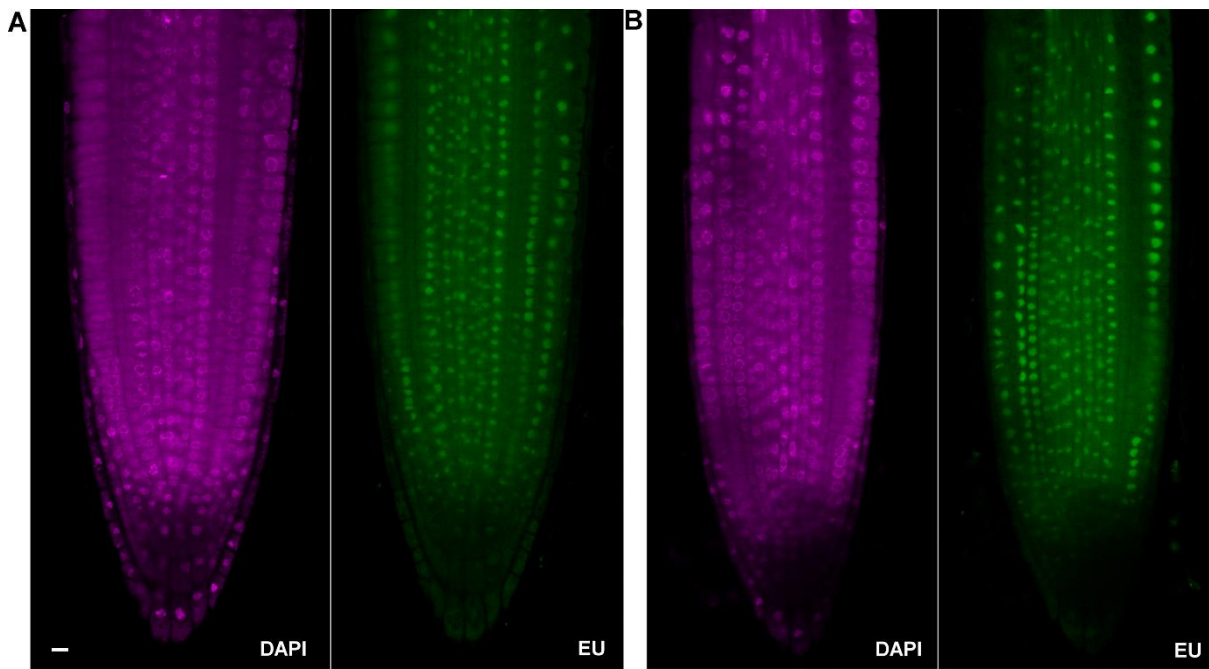

**Supplementary Figure 3. Negligible effect of incubation in the dark or the light.**

*Arabidopsis* 4 days old seedlings were incubated for 2 h with 1 mM EU (green) in the dark (**A**) or in the light (**B**), fixed and EU-containing RNA was detected by the click iT reaction, bar= 10  $\mu$ m
